# Supplementary material for: Aggregation of amyloid peptides into fibrils driven by nanoparticles and their curvature effect
Source: Royal Society of Chemistry journal article supplement (doi:10.1039/c8cp07211f), 2018-12-18
Supplement: c8cp07211f1.pdf [file c8cp07211f1.pdf]

## **Electronic Supplementary Information**

### **Aggregation of Amyloid Peptides into Fibrils Driven by Nanoparticles and their Curvature Effect**

Bin Li<sup>1</sup>, Ran Zhang<sup>2</sup>, and Xinghua Shi<sup>1,3\*</sup>

<sup>1</sup>CAS Key Laboratory of Nanosystem and Hierarchical Fabrication, CAS Center for Excellence in Nanoscience, National Center for Nanoscience and Technology, Beijing 100190, P.R. China

<sup>2</sup>State Key Laboratory of Polymer Physics and Chemistry, Changchun Institute of Applied Chemistry, Chinese Academy of Sciences, Changchun 130022, P. R. China

<sup>3</sup>University of Chinese Academy of Sciences, Beijing 100049, P.R. China

\* Corresponding author: [shixh@nanoctr.cn](mailto:shixh@nanoctr.cn)

## The hydrogen bonding method and peptide chain stiffness

We adopted the hydrogen bonding approach developed by Olvera de la Cruz et al.<sup>1,2</sup>. Firstly, we preset that a CG bead could form two hydrogen bonds at most, considering there are one donor N-H and one acceptor C=O in each amino acid. The hydrogen bonds were allowed to form or break during the simulation. We defined the activation energy for forming the first hydrogen bond of the CG bead as

$$U_a = \varepsilon_\beta \cos(\vartheta_{ij}), \quad (1)$$

where  $\varepsilon_\beta = 3k_B T$  is the activation energy parameter which determines the probability of forming or breaking hydrogen bonds.  $\vartheta_{ij}$  is the angle between the bonded CG beads in the two adjacent chains,  $\cos(\vartheta_{ij}) = (\Delta\vec{r}_i \cdot \Delta\vec{r}_j) / (\Delta r_i \Delta r_j)$ , in which  $\Delta\vec{r}_i = \vec{r}_{i+1} - \vec{r}_{i-1}$ , the bead  $i$  and  $j$  belong to different chains. As shown in Figure 1a, the two peptide chains could tend to parallel with each other according to the equation.

For the second hydrogen bond, the CG bead  $k$  from the third chain would be supplied and placed along the connection of the CG beads  $i$  and  $j$ . We added an additional parameter  $\varphi_i$  to describe the angle between the two hydrogen bonds  $ij$  and  $ik$ , which should be close to  $180^\circ$  (shown in Figure 1a). The angle  $\varphi_i$  was defined as  $\cos(\varphi_i) = (\Delta\vec{r}_{ki} \cdot \Delta\vec{r}_{ij}) / (\Delta r_{ki} \Delta r_{ij})$ , so the activation energy for the second hydrogen bond was

$$U_a = \varepsilon_\beta \cos(\vartheta_{ij}) \cos(\varphi_i). \quad (2)$$

In addition, once the hydrogen bonds were formed, we added the formation energy of hydrogen bond, as well as the fibril bending energy into the total energy. The formation energy of hydrogen bond was set at  $U_h = -3k_B T$  for each hydrogen bond, according to

the previous experimental and simulation works<sup>3,4</sup>. The fibril bending energy was described as,

$$U_{fib} = g_i(1 + \cos \varphi)^2, \quad (3)$$

which was similar as the equation of peptide intramolecular bending energy described in the main text (Equation 2). The rigidity constant  $g_i$  was also set at  $100k_B T$ . The total bending energy was composed of the fibril bending energy and the intramolecular bending energy.

The probabilities for forming and breaking hydrogen bonds,  $p_{form}$  and  $p_{break}$ , were determined by the following criterion, respectively

$$p_{form} = \frac{g(U_{a,ij})}{1 + g(U_{a,ij})}, \quad (4)$$

$$p_{break} = \frac{1}{1 + g(U_{a,ij})}, \quad (5)$$

where  $g(U_{a,ij}) = \exp(-U_{a,ij}/k_B T)$ ,  $U_{a,ij}$  is the activation energy for forming or breaking hydrogen bond between two CG beads. If the distance between two CG beads was smaller than  $1.5\sigma$ , a random number  $R$  between 0 and 1 could be generated. If  $R$  is smaller than  $p_{form}$  or  $p_{break}$ , we would perform the step of forming or breaking of hydrogen bonds.

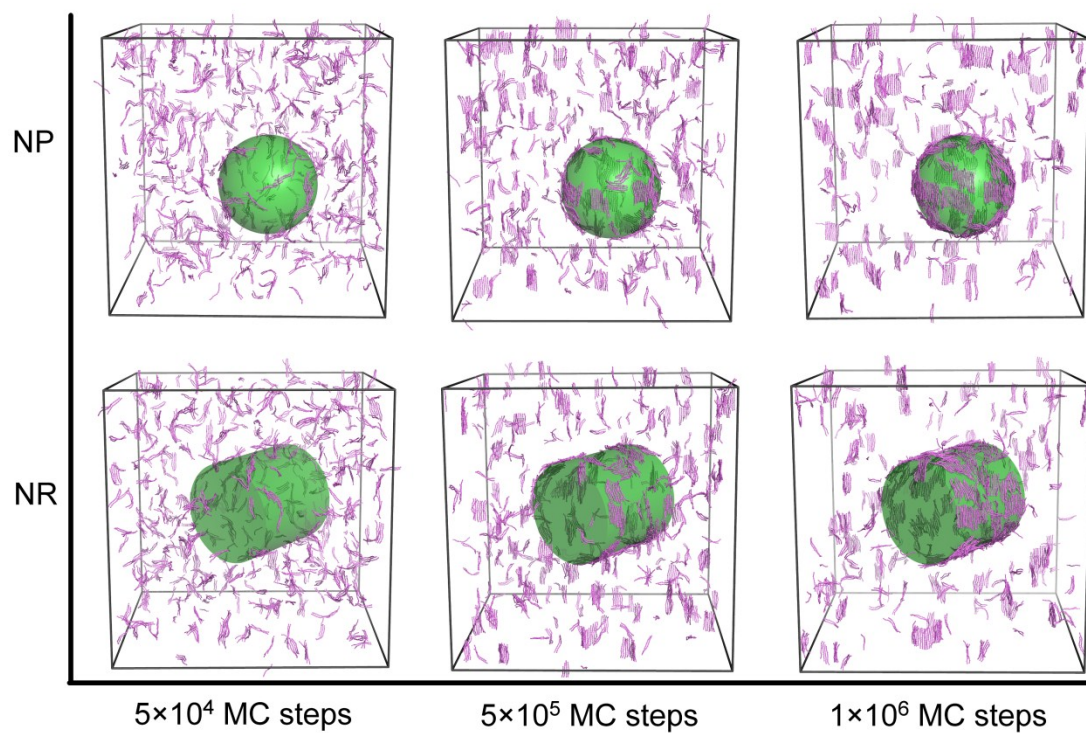

**Fig. S1** The kinetic pathways for the formation of fibrillation structures on NP and NR surfaces with diameter  $64\sigma$ . The top three figures are the snapshots of NP system for  $5 \times 10^4$  MC steps,  $5 \times 10^5$  MC steps and  $1 \times 10^6$  MC steps; the bottom three are the snapshots of NR system at same MC steps.

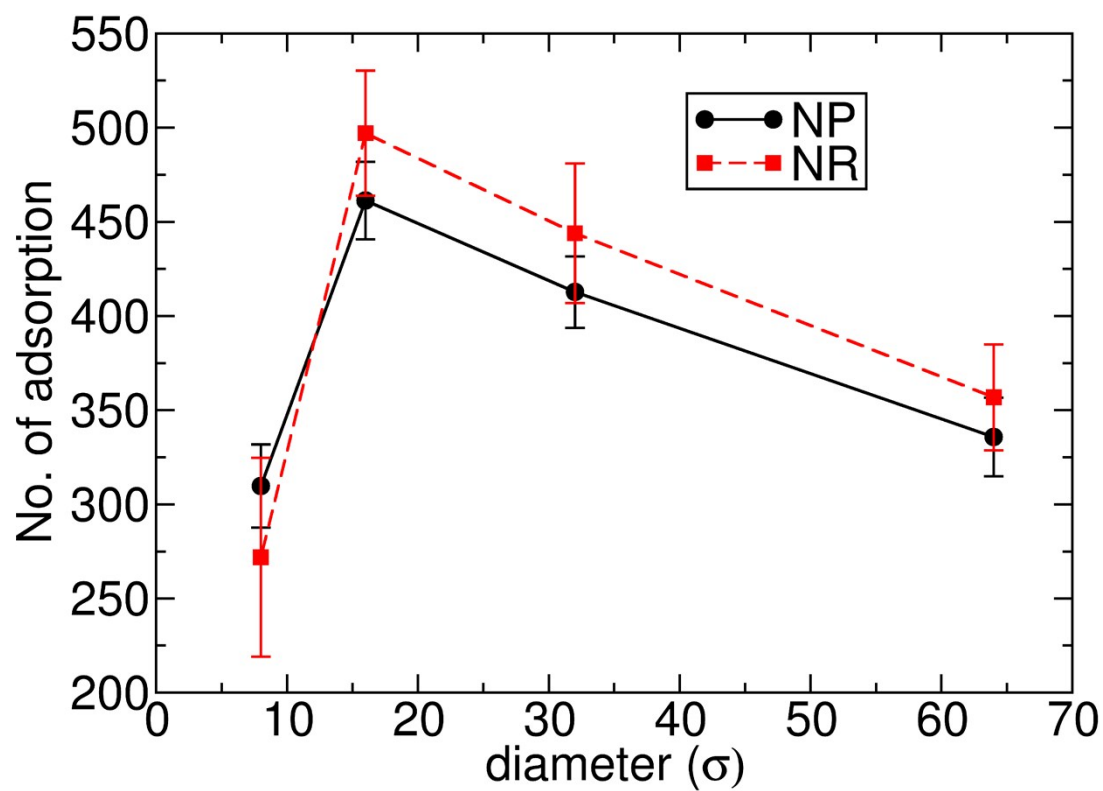

**Fig. S2** The number of peptide chains adsorbed on the surfaces of NPs/NRs in lower concentration peptide systems,  $x$  axis corresponds the diameters of NPs, as well as diameters and heights in NRs.

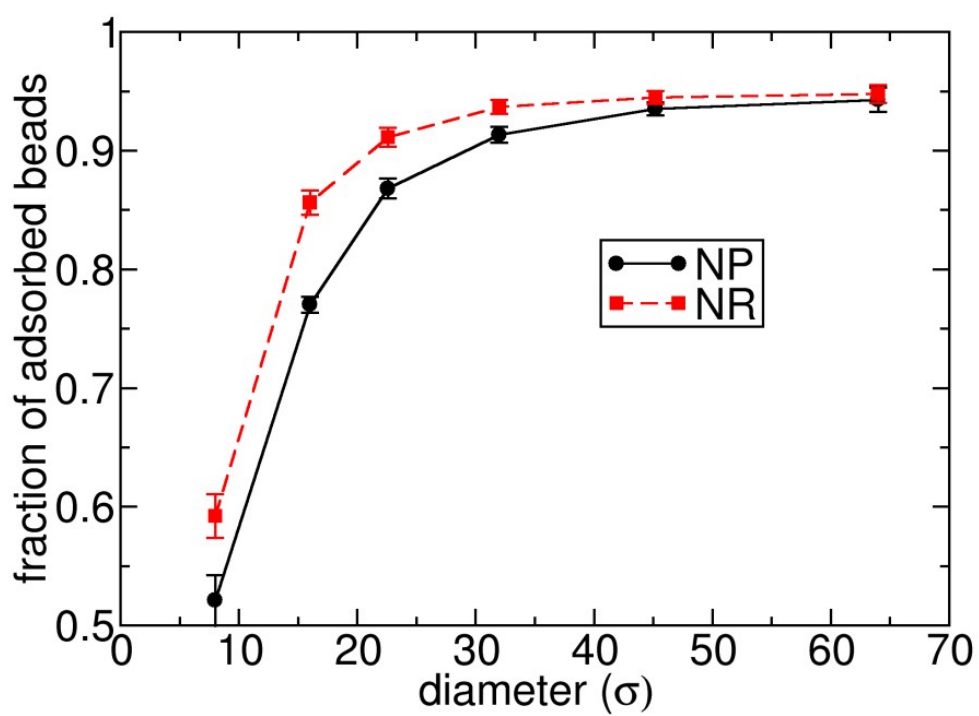

**Fig. S3** The fraction of beads adsorbed on NPs/NRs surfaces in each peptide chain.

**Table S1** The parameters of NPs with different diameters

|                       |     |      |      |      |      |      |
|-----------------------|-----|------|------|------|------|------|
| diameter ( $\sigma$ ) | 8.0 | 16.0 | 22.6 | 32.0 | 45.2 | 64.0 |
| number of beads in NP | 40  | 160  | 320  | 640  | 1280 | 2560 |
| number of NPs         | 64  | 16   | 8    | 4    | 2    | 1    |

**Table S2** The parameters of NRs with different sizes

|                                 |     |      |      |      |      |      |
|---------------------------------|-----|------|------|------|------|------|
| diameter ( $\sigma$ )           | 8.0 | 16.0 | 22.6 | 32.0 | 45.2 | 64.0 |
| height ( $\sigma$ )             | 8.0 | 16.0 | 22.6 | 32.0 | 45.2 | 64.0 |
| number of beads on side surface | 40  | 160  | 320  | 640  | 1280 | 2560 |
| number of NRs                   | 64  | 16   | 8    | 4    | 2    | 1    |

## References

- 1 Y. S. Velichko, S. I. Stupp and M. Olvera de la Cruz, *J. Phys. Chem. B*, 2008, **112**, 2326–2334.
- 2 R. Zhang, X. Duan, T. Shi, H. Li, L. An and Q. Huang, *Macromolecules*, 2012, **45**, 6201–6209.
- 3 S. Auer, C. M. Dobson and M. Vendruscolo, *HFSP J.*, 2007, **1**, 137–146.
- 4 A. R. Fersht, J.-P. Shi, J. Knill-Jones, D. M. Lowe, A. J. Wilkinson, D. M. Blow, P. Brick, P. Carter, M. M. Y. Waye and G. Winter, *Nature*, 1985, **314**, 235–238.
